# Supplementary material for: Generation of functionally competent hepatic stellate cells from human stem cells to model liver fibrosis in vitro
Source: PubMed Central journal article supplement — Stem Cell Reports. 2022 Oct 20;17(11):2531–47. doi: 10.1016/j.stemcr.2022.09.010 (PMC9669405; doi:10.1016/j.stemcr.2022.09.010), 2022-10-20
Supplement: mmc1.pdf [file mmc1.pdf]

**Stem Cell Reports, Volume 17**

## **Supplemental Information**

### **Generation of functionally competent hepatic stellate cells from human stem cells to model liver fibrosis *in vitro***

**Xinyuan Lai, Chuanyun Li, Chengang Xiang, Zihang Pan, Kai Zhang, Lei Wang, Bingqing Xie, Junning Cao, Jihang Shi, Juan Deng, Shichun Lu, Hongkui Deng, Hui Zhuang, Tong Li, Yan Shi, and Kuanhui Xiang**

## **Supplemental Information**

### **Generation of functionally competent hepatic stellate cells from human stem cells to model liver fibrosis *in vitro***

Xinyuan Lai, Chuanyun Li, Chengang Xiang, Zihang Pan, Kai Zhang, Lei Wang, Bingqing Xie, Junning Cao, Jihang Shi, Juan Deng, Shichun Lu, Hongkui Deng, Hui Zhuang, Tong Li, Yan Shi, Kuanhui Xiang

## Supplementary figures and Legends

**Figure S1**

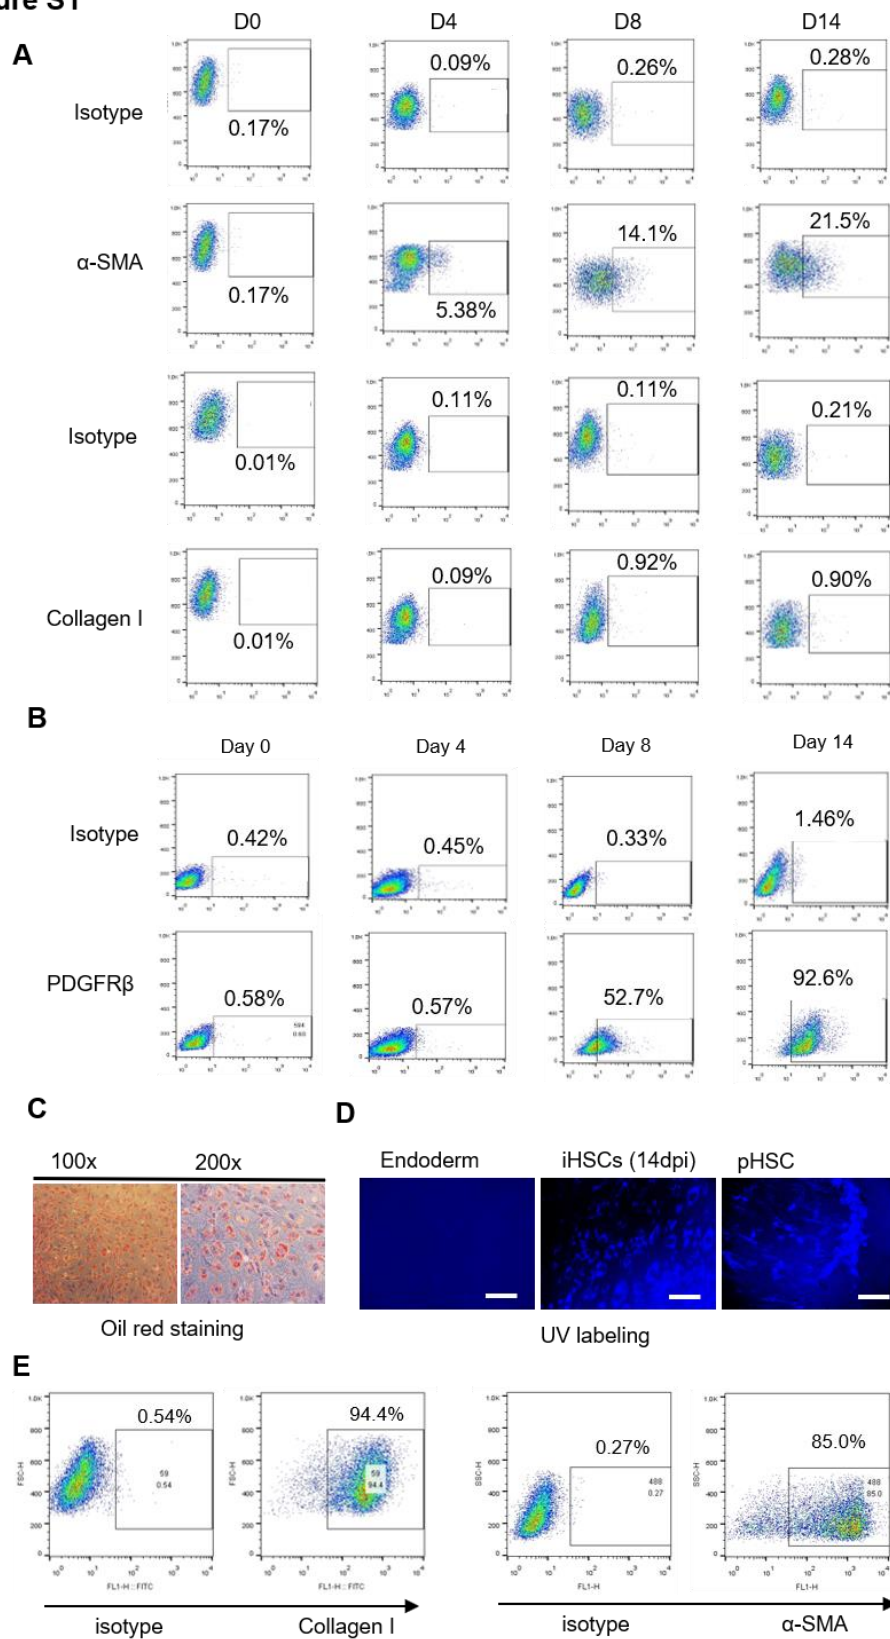

**Figure S1. Characterization of endoderm derived iHSCs from hESCs (H9).**

**Related to Figure 1.** (A) Representative flow cytometry plot of  $\alpha$ -SMA and collagen I at day 0, 4, 8 and 14 differentiation from hESCs to iHSCs. Positive gates were defined based on the isotype control. (B) Flow cytometry analysis of PDGFR $\beta$  at day 0, 4, 8, 14 during the iHSCs differentiation. (C) Representative images of oil red staining analysis of the iHSCs. (D) UV beaching of endoderm, iHSC and pHSC under microscope. Scale bars, 100  $\mu$ m. (E) Flow cytometry analysis of  $\alpha$ -SMA and collagen I in iHSCs during the activation by TGF $\beta$ . Positive gates were defined based on the isotype control.

Figure S2

A

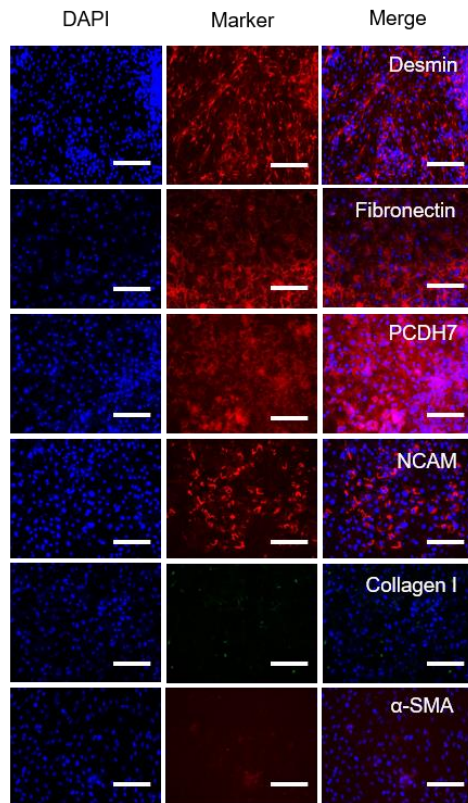

B

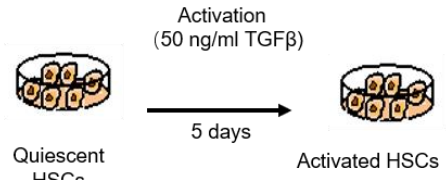

C

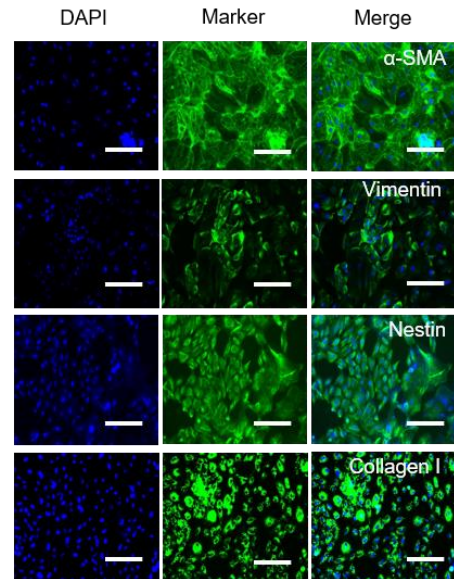

**Figure S2. Characterization of iHSCs differentiated from hESCs (H1). Related to**

**Figure 4.** (A) Representative images of endoderm derived iHSCs markers expression.

Scale bars, 100  $\mu$ m. (B) Schematic representation of the activation of the iHSCs by

TGF $\beta$  (50 ng/ml). (C) Representative images of activated iHSCs markers expression.

Scale bars, 100  $\mu$ m.

**Figure S3**

**A**

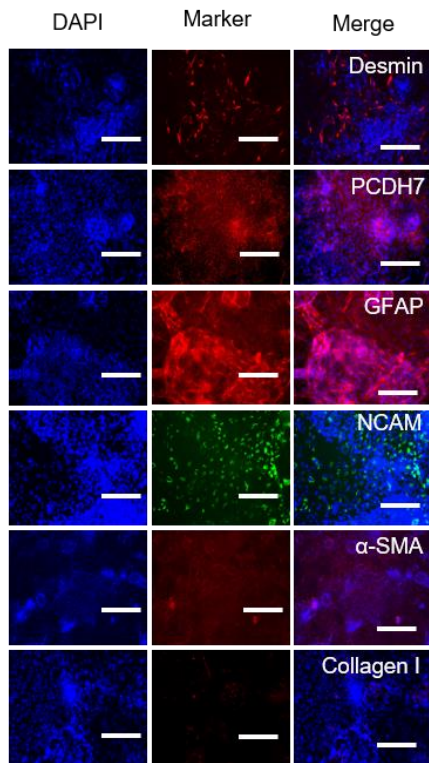

**B**

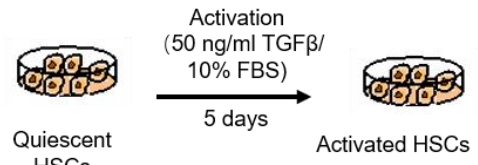

**C**

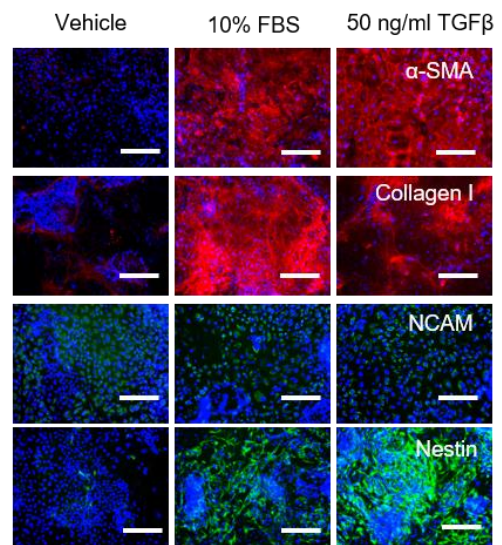

**Figure S3. Characterization of iHSCs differentiated from iPSCs. Related to Figure**

**4.** (A) Representative images of endoderm derived iHSCs markers expression. Scale bars, 100  $\mu\text{m}$ . (B) Schematic representation of the activation of the iHSCs by TGF $\beta$  (50 ng/ml) and 10% FBS. (C) Representative images of activated iHSCs markers expression. Scale bars, 100  $\mu\text{m}$ .



**Figure S4**

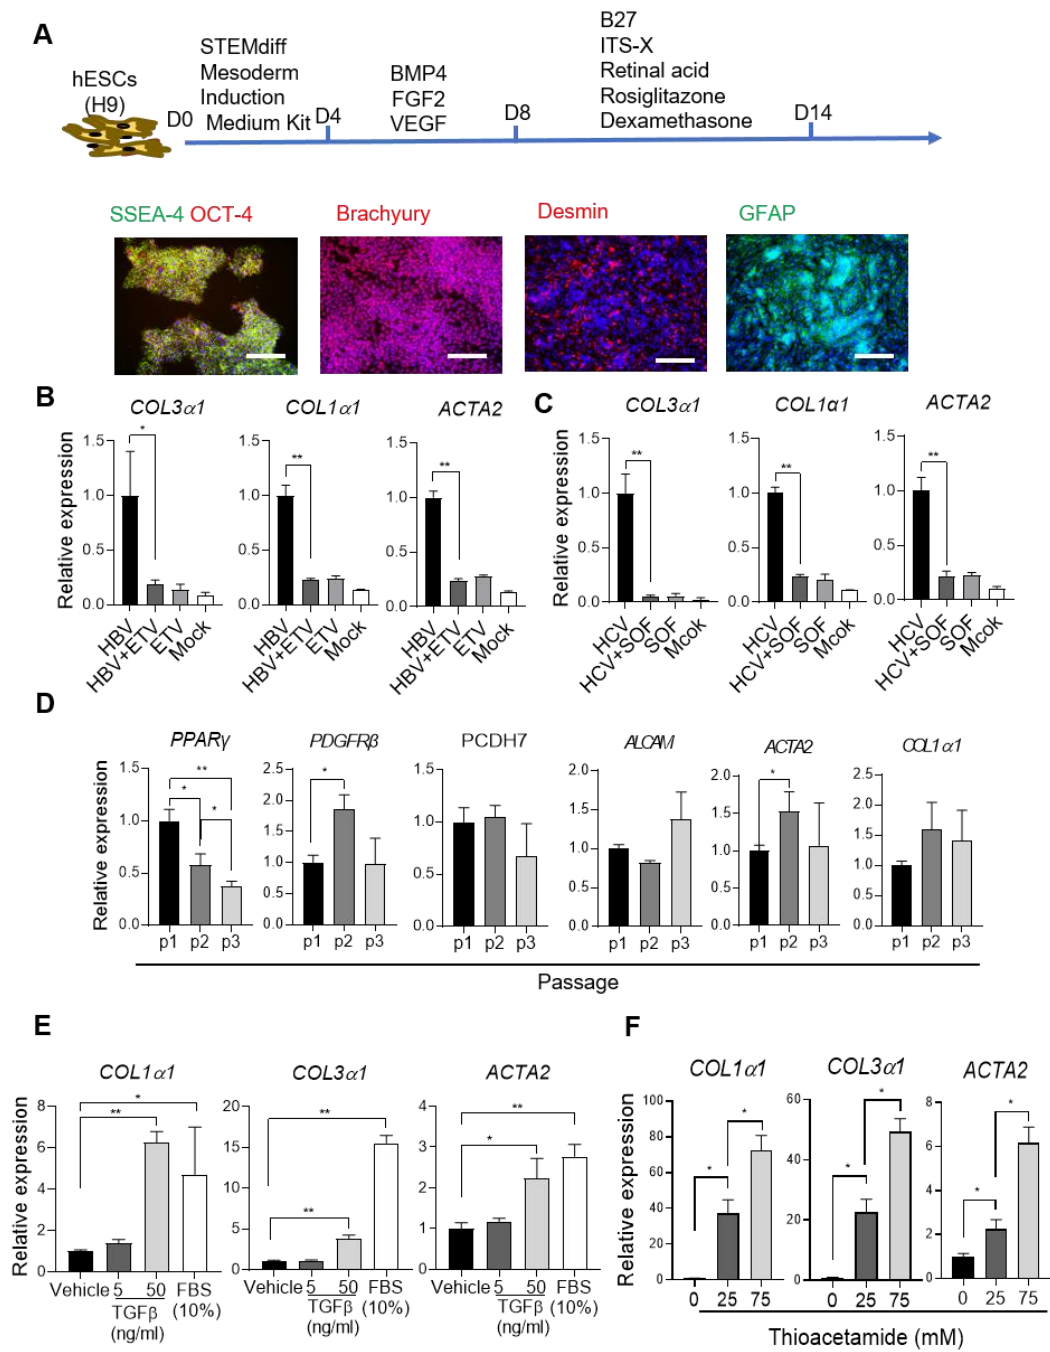

**Figure S4. Characterization of mesoderm derived iHSCs from hESCs (H9).**

**Related to Figure 7.** (A) Representative images of hESCs, mesoderm and iHSCs related markers during the different stage of iHSCs differentiation according to the protocol shown above. Scale bars, 100  $\mu\text{m}$ . (B) RT-qPCR analysis of *COL3a1*, *COL1a1* and *ACTA2* expression in the co-culture of iHSCs and HBV (500 geq/cell) infected HepG2-NTCP with or without entecavir (ETV) (500 nM) treatment for 7 days. (C) RT-qPCR analysis of *COL3a1*, *COL1a1* and *ACTA2* expression in the co-culture of iHSCs and HCV (MOI: 10) infected Huh7.5 cells with or without sofosbuvir (700 nM) for 3 days. (D) RT-qPCR analysis of gene expression in iHSCs at different passages. (E) RT-qPCR analysis of *COL1a1*, *COL3a1* and *ACTA2* expression of the second passaged iHSCs by the treatment of TGF $\beta$  and fetal bovine serum (FBS). (F) RT-qPCR analysis of *COL1a1*, *COL3a1* and *ACTA2* expression of the second passaged iHSCs by the treatment of different concentrations of thioacetamide. RT-qPCR data shown as the means $\pm$ SEM from 3 independent experiments, n=3 in each group. Student's t test was used. \* $p$ <0.05.

**Figure S5**

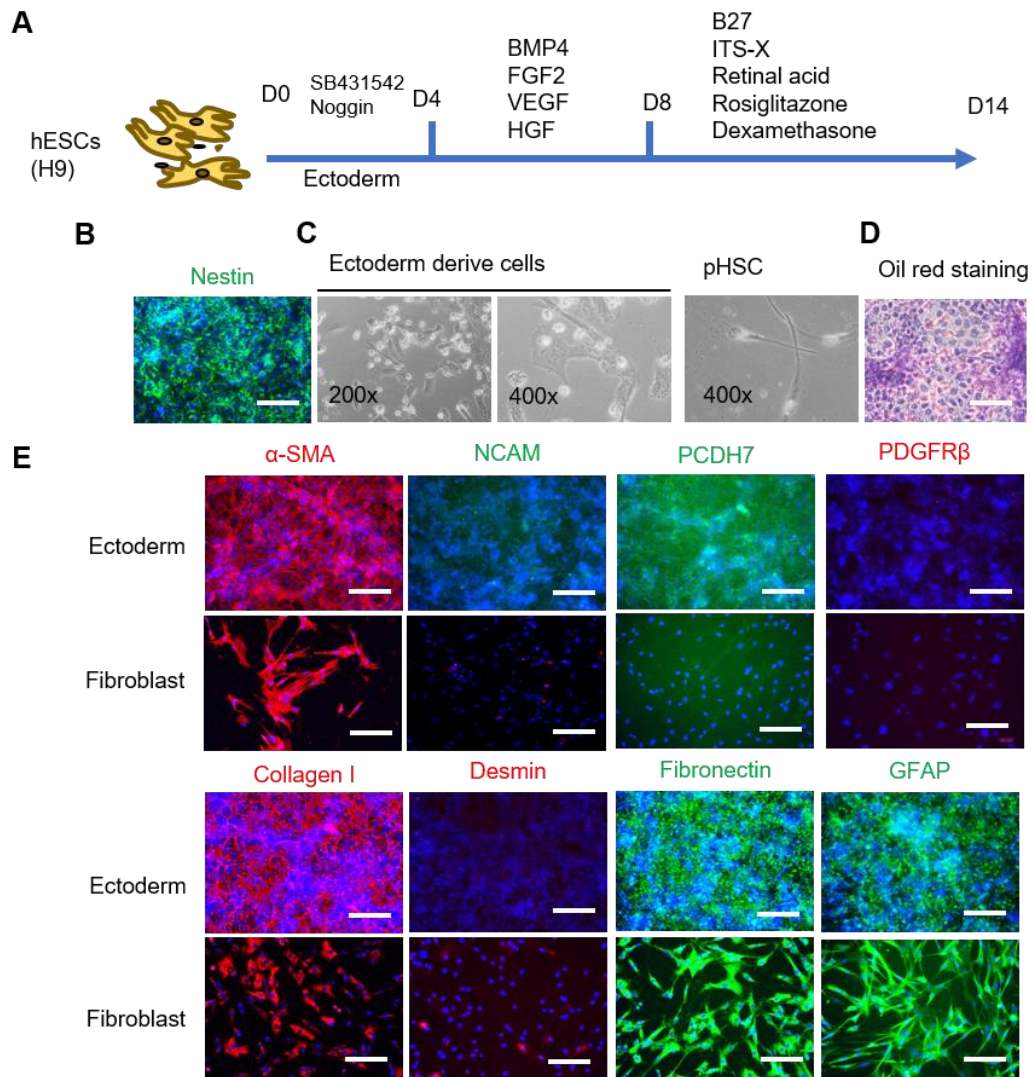

**Figure S5. Characterization of ectoderm derived differentiation by the established differentiation protocol. Related to Figure 7.** (A) Schematic representation of the differentiation process from day 0 to day 14. (B) Representative image of nestin expression in ectoderm. Scale bars, 100  $\mu\text{m}$ . (C) Representative images of cell morphology on day 14 differentiation. (D) Oil red staining analysis of lipid droplet in ectoderm derived cells. (E) Representative images of ectoderm derived cells and fibroblast cells. Scale bars, 100  $\mu\text{m}$ .

## **Supplementary Tables**

**Table S1 Top downregulated genes in iHSCs compared to other cells. (See the excel file)**

**Table S2 Antibodies used for immunofluorescence assay and flow cytometry.**

| Protein        | Supplier              | Dilution |
|----------------|-----------------------|----------|
| $\alpha$ -SMA  | Abcam                 | 1/500    |
| ALCAM          | Abcam                 | 1/500    |
| $\beta$ -Actin | Cell Signaling        | 1/500    |
| Collagen I     | Abcam                 | 1/500    |
| Desmin         | Abcam                 | 1/500    |
| Fibronectin    | Sigma                 | 1/500    |
| NCAM           | Sigma                 | 1/500    |
| NGF            | Santa Cruz            | 1/500    |
| PDCH7          | Abcam                 | 1/500    |
| PDGFR $\beta$  | Abcam (Cambridge. UK) | 1/500    |
| Vimentin       | Sigma                 | 1/500    |
| SSEA-4         | Stem cell             | 1/500    |
| Nestin         | R&D Systems           | 1/500    |
| Sox17          | R&D Systems           | 1/500    |
| Brachyury      | CST                   | 1/500    |
| GFAP           | R&D Systems           | 1/500    |
| AFP            | Sigma                 | 1/500    |

**Table S3. List of primers.**

| Gene            | Forward (5'→3')                | Reverse (5'→3')             |
|-----------------|--------------------------------|-----------------------------|
| GAPDH           | AGCCACATCGCTCAGACAC            | GCCCAATACGACCAAATCC         |
| RPS11           | GCCGAGACTATCTGCACTAC           | ATGTCCAGCCTCAGAACTTC        |
| COL1 $\alpha$ 1 | GACACAGAGGTTTCAGTGG            | CACCCTTAGCACCAACAG          |
| COL3 $\alpha$ 1 | GGAGCTGGCTACTTCTCGC            | GGGAACATCCTCCTTCAACAG       |
| ALB             | TGGCACAATGAAGTGGGTAA           | CTGAGCAAAGGCAATCAACA        |
| PDGFR $\alpha$  | AACCCTGCTGATGAAAGCAC           | TCCTTTCTAGCATGGGGACA        |
| Desmin          | AGGAACAGCAGGTCCAGGTA           | AGAGCATCAATCTCGCAGGT        |
| GFAP            | GGATGGAGAGGTCATTAAGGA          | GGTGAGTTTCTTGTTAGTTGGA      |
| PDGFR $\beta$   | CCCTTATCATCCTCATCATGC          | CCTTCCATCGGATCTCGTAA        |
| Oct-4           | GATGGCGTACTGTGGGCC             | TGGGACTCCTCCGGGTTTTG        |
| ALCAM           | ACCTCAGAATCTCATGTTTGG          | GTTTAGATGGTTGCTTGAACAC      |
| ACTA2           | CCAGAGCCATTGTCACACAC           | CAGCCAAGCACTGTCAGG          |
| NCAM            | AGGAGACAGAAACGAAGCCA           | GGTGTTGGAAATGCTCTGGT        |
| FOXA2           | ATTGCTGGTCGTTTGTGTG            | TACGTGTTTCATGCCGTTTCAT      |
| SOX17           | CGCACGGAATTTGAACAGTA           | GGATCAGGGACCTGTCACAC        |
| hSTAP           | TGCCAGTGACTTCCCACCT            | TAGATGAGGCCACGCAGC          |
| AFP             | AGA CTG AAA ACC CTC TTG AAT GC | GTC CTC ACT GAG TTG GCA ACA |
| PCDH7           | GGATCGGGTGAGGTGACTTTC          | GTTCTCGTCGAAGATCATCTGAC     |
| THY-1           | AAGGACGAGGGCACCTACAC           | GAGGTGTTCTGAGCCAGCAG        |
| PPAR $\gamma$   | GAGGAGAGTTACTTGGTCGT           | CAACAGACAAATCACCATTTCG      |

## **Supplementary Experimental Procedures**

### **Immunofluorescence staining**

The immunofluorescence staining for related markers expression was performed as previously described (Coll et al., 2018). Briefly, cells were fixed in 4% para-formaldehyde in phosphate-buffered saline (PBS) at room temperature for 10 min and permeabilized with 0.1% Triton X-100 in PBS. Then, the cells were blocked with blocking buffer [PBS containing 10% goat serum, 1% bovine serum albumin (BSA)] at room temperature for 2 h. Cells were incubated overnight at 4 °C with primary antibody diluted with blocking buffer. Secondary antibodies (1:1000 dilution) were incubated in dark at room temperature for 1 h. Nuclei were stained with 4',6-diamidino-2-phenylindole (DAPI) diluted in PBS at room temperature for 20 min. Antibodies and dilutions used are listed in Table S2.

### **Quantitative real-time RT-PCR**

Total RNA was obtained by using the RNeasy Mini Kit (QIAGEN) followed by reverse transcription with Superscript III First-Strand Synthesis System. Gene expression was determined by quantitative real-time PCR on ABI 7500 cycler using Powerup SYBR master mix (Life technologies). The gene expression was normalized to RPS11 and calculated with the comparative Ct method ( $2^{-\Delta\Delta C_t}$ ). Primers are listed in Table S3.



### **Flow cytometry**

Differentiated cells were dissociated into a single-cell suspension and stained with antibodies for COT4, SSEA4, Brachyury, PDGFR $\beta$ , PDGFR $\alpha$ , Collagen I and  $\alpha$ -SMA. Stained cells were analyzed with FACSCanto II cytometer and FlowJo VX software. FACS plot showing populations were usually 10,000 and the positive gates were defined based on the isotype control.

### **Oil red staining**

The differentiated cells at day 14 were analyzed for the vitamin A uptake by oil red staining. Cells were washed by DPBS for three times and fixed with 4% para-formaldehyde in PBS at room temperature for 10 min followed by 60% isopropanol washing. Then, cells were incubated with Oil Red (Sigma) working solution (6:4 Oil Red: ddH<sub>2</sub>O) for 30 min at room temperature. Finally, cells were counterstained with Gill's hematoxylin and washed with PBS. The images were performed by a fluorescence microscope (ECHO laboratories, USA)

### **Vitamin A storage assay**

The vitamin A storage assay was performed as previously described. Briefly, the differentiated cells at day 14 were measured by the auto-fluorescence after UV light excitation and flow cytometry.

### **Genome wide transcriptome analysis of iHSCs**

RNA-seq was performed at Novogene Co. Ltd. Total RNA was isolated from endoderm derived iHSCs (iHSC-end, n=3 independent differentiations), mesoderm derived iHSCs (iHSCs-M<sub>2</sub>, n=3 independent differentiations), fibroblast (n=3 independent fibroblast cells), purchased primary HSCs (purHSC, n=3 independent donors cells bought from Lonza) and freshly pHSCs isolated from liver transplantation patients (n=3 different liver donors). Total RNA was isolated by using the RNeasyMini Kit (QIAGEN). RNA sequencing libraries were prepared by using the NEBNext Ultra™ RNA library Prep kit for Illumina (NEB) following the manufacturer's instructions. The randomly primed 150-bp paired-end libraries were sequenced on Illumina HiSeq 4000 platform. Raw data for human quiescent HSC (Liu et al., 2020) (qHSCs, GSE141100), hepatocyte (Jacquemin et al., 2013) (hep, GSE43984) and cultured hepatocytes (Koui et al., 2017) (cul\_hep, GSE43984) and the iPSC-derived qHSC like cells (Koui et al., 2021) (TkDN4\_M\_qHSCs and FF-1\_qHSCs, GSE155017) were extracted from GEO. The reads were aligned to the human genome (hg38) using STAR v2.7.9a (Dobin et al., 2013) and gene expression levels were estimated using featureCounts (Liao Y et al, 2014). DESeq2 (Love et al., 2014) was used to perform differential gene expression analysis. The HSC gene set signature previously described (Coll et al., 2018) was used to perform a gene set enrichment analysis (GSEA). DAVID bioinformatics Resources 6.8 R package clusterProfiler was used to perform gene ontology (GO) and KEGG pathway analysis (Wu et al., 2021). Principal component analysis (PCA) was generated with R PCA function using scaled gene expression. Heatmaps were generated by the pheatmap package.

### **Transwell co-culture of HepaRG with iHSCs or pHSCs**

HepaRG cells were cultured in the HepaRG culture medium (Biopredic). Differentiated HepaRG cells (60,000 cells/well) were seeded in the insert of the transwell cultured in the Serum-free HepaRG medium. At the same time, the endoderm and mesoderm derived iHSCs (80,000 cells/well) were cultured in the plates. Then, the inserts were transferred in the iHSCs or pHSCs wells to form HepaRG co-cultured with iHSCs. As a positive control, iHSCs were replaced by primary human HSCs.

### **Exposure of iHSCs to acetaminophen and thioacetamide**

Differentiated iHSCs cells were seeded at 80,000 cells per well in the Matrigel coated 24-well plate. Acetaminophen and thioacetamide at the concentration of 0, 25 and 75 mM were added to treat the cells for 48 h. The cells were harvested to analyze the activation of iHSCs by hepatotoxin exposure. Cell viability assay was performed by CellTiter-Blue assay as manufacturer's instructions.

### **Exposure of co-cultured iHSCs/pHSCs and HepaRG to acetaminophen**

Differentiated HepaRG cells (60,000 cells/well) were seeded in the insert of the transwell cultured in the serum-free HepaRG medium. The bottom of the transwell plate was seeded with the iHSCs or pHSCs (80,000 cells/well). The cells were put in a well for co-culture. The cells were exposed to the 0, 25 and 75 mM of acetaminophen for 48 h. RT-qPCR assay was performed to analyze the mRNA levels of HSCs activated

markers. Cell viability assay was performed by CellTiter-Blue assay as manufacturer's instructions (Coll et al., 2018).

#### **Exposure of iHSCs to HBV infected HepG2-NTCP cells**

HepG2-NTCP cells (60,000 cells/well) were seeded in the insert of the transwell plate and infected with HBV (500 geq/cell) for 24 h. The next day, the cells were washed with PBS and replenish with fresh serum-free differentiation medium and co-cultured with iHSCs (80,000 cells/well) respectively for seven days. 500 nM of entecavir (ETV) was used as control for inhibition of HBV replication (Michailidis et al., 2017).

#### **Exposure of iHSCs to HCV infected Huh7.5 cells**

Huh7.5 cells (60,000 cells/well) were seeded in the insert of the transwell plate and infected with HCV (JFH1, MOI:10) for 24 h. The next day, the cells were washed with PBS and replenish with fresh serum-free differentiation medium and co-cultured with iHSCs (80,000 cells/well) respectively for three days. The 700 nM of sofosbuvir (SOF) was used as control for inhibition of HCV replication (PascalMutz et al., 2018).

#### ***In vitro* activation of iHSCs**

Differentiated cells at day 14, iHSCs were seed with 60 thousand per well in the 24-well plate and activated by incubating with Transforming Growth factor  $\beta$  (TGF $\beta$ ) (5 ng/ml or 50 ng/ml) or FBS (10%) for different days as designed. RT-qPCR was used to evaluated stellate cells activation related gene expression after different days of

incubation.

### ***In vitro* wound-healing assay**

After performed a scratch, the differentiated cells and primary HSCs were stimulated with 25 ng/ml PDGF-BB (Sigma) and 10% FBS for 24h. Images were captured with a fluorescence microscope (ECHO laboratories, USA). The wound closure distances were measured using ImageJ software.

### **Measurement of secreted collagen I**

The secreted collagen I was detected by the chemiluminescence immunoassay (CLIA) kit according to the manufacturer's instructions (Ding Sheng Xing Ye Co.) detected by manufacturer-provided luminometer.

## References

Coll, M., Perea, L., Boon, R., Leite, S.B., Vallverdu, J., Mannaerts, I., Smout, A., El Taghdouini, A., Blaya, D., Rodrigo-Torres, D., *et al.* (2018). Generation of hepatic stellate cells from human pluripotent stem cells enables in vitro modeling of liver fibrosis. *Cell Stem Cell* 23, 101-113 e107.

Jacquemin, M.G., Covens, K., Jazouli, N., Sokal, E., Peerlinck, K., and Shahani, T. (2013). Human liver sinusoidal endothelial cells but not hepatocytes contain FVIII. *J Thromb Haemost* 11, 323-323.

Koui, Y., Himeno, M., Mori, Y., Nakano, Y., Saijou, E., Tanimizu, N., Kamiya, Y., Anzai, H., Maeda, N., Wang, L., *et al.* (2021). Development of human iPSC-derived quiescent hepatic stellate cell-like cells for drug discovery and in vitro disease modeling. *Stem Cell Reports* 16, 3050-3063.

Koui, Y., Kido, T., Ito, T., Oyama, H., Chen, S.W., Katou, Y., Shirahige, K., and Miyajima, A. (2017). An in vitro human liver model by iPSC-derived parenchymal and non-parenchymal cells. *Stem Cell Reports* 9, 490-498.

Liu, X., Rosenthal, S.B., Meshgin, N., Baglieri, J., Musallam, S.G., Diggie, K., Lam, K., Wu, R., Pan, S.Q., Chen, Y., *et al.* (2020). Primary alcohol-activated human and mouse hepatic stellate cells share similarities in gene-expression profiles. *Hepatology* 71, 606-626.

Michailidis, E., Pabon, J., Xiang, K.H., Park, P., Ramanan, V., Hoffmann, H.H.,

Schneider, W.M., Bhatia, S.N., de Jong, Y.P., Shlomai, A., *et al.* (2017). A robust cell culture system supporting the complete life cycle of hepatitis B virus. *Sci Rep* 7, 16616.

PascalMutz, PhilippeMetz, FlorianA.Lempp, SilkeBender, BingqianQu, KatrinSchöneweis, StefanSeitz1ThomasTu, AgneseRestuccia, JamieFrankish, ChristopherDächert, *et al.* (2018). HBV bypasses the innate immune response and does not protect HCV from antiviral activity of interferon. *Gastroenterology* 154, 1791-1804.

Wu, T., Hu, E., Xu, S., Chen, M., Guo, P., Dai, Z., Feng, T., Zhou, L., Tang, W., Zhan, L., *et al.* (2021). clusterProfiler 4.0: A universal enrichment tool for interpreting omics data. *Innovation* 2, 100141.
